# Supplementary material for: Cultivar and Harvest Time of Almonds Affect Their Antioxidant and Nutritional Profile through Gut Microbiota Modifications
Source: MDPI journal article supplement (doi:10.3390/antiox13010084), 2024-01-09
Supplement: s1 [file s1]

# Supplementary Materials

## Cultivar and harvest time of almonds modify the antioxidant and nutritional profile of almonds through gut microbiota modifications

**Adriana Delgado-Osorio<sup>1</sup>, Beatriz Navajas-Porras<sup>1</sup>, Sergio Pérez-Burillo<sup>1</sup>, Daniel Hinojosa-Nogueira<sup>1</sup>, Ángela Toledano-Marín<sup>1</sup>, Silvia Pastoriza de la Cueva<sup>1</sup>, Oleg Paliy<sup>2</sup> and José Ángel Rufián-Henares<sup>1,3,\*</sup>**

<sup>1</sup> Departamento de Nutrición y Bromatología, Instituto de Nutrición y Tecnología de los Alimentos, Centro de Investigación Biomédica, Universidad de Granada. Av. del Hospicio, s/n, 18012 Granada, Spain; [adrianadelgado@ugr.es](mailto:adrianadelgado@ugr.es) (A.D.O.), [beatriznavajas@ugr.es](mailto:beatriznavajas@ugr.es) (B.N.P.), [spburillo@ugr.es](mailto:spburillo@ugr.es) (S.P.B.), [dhinojosa@ugr.es](mailto:dhinojosa@ugr.es) (D.H.), [antolemarin@correo.ugr.es](mailto:antolemarin@correo.ugr.es) (A.T.M.), [spdelacueva@ugr.es](mailto:spdelacueva@ugr.es) (S.P.), [jarufian@ugr.es](mailto:jarufian@ugr.es) (J.A.R.H.)

<sup>2</sup> Department of Biochemistry and Molecular Biology, Boonshoft School of Medicine, Wright State University, Dayton, Ohio, USA; [oleg.paliy@wright.edu](mailto:oleg.paliy@wright.edu) (O.P.)

<sup>3</sup> Instituto de Investigación Biosanitaria ibs.GRANADA, Universidad de Granada. Avda. de Madrid 15, 2a Planta, 18012 Granada Granada, Spain; [jarufian@ugr.es](mailto:jarufian@ugr.es)

\*Correspondence: [jarufian@ugr.es](mailto:jarufian@ugr.es);

**Table S1.** Morphological measurements of almonds collected at three harvest times and submitted to *in vitro* digestion-fermentation.

| Harvest Time | Length (cm) | Width (cm)               | Thickness (cm)           |
|--------------|-------------|--------------------------|--------------------------|
| T1           | 2.18 ± 0.26 | 1.09 ± 0.12 <sup>a</sup> | 0.71 ± 0.11 <sup>a</sup> |
| T2           | 2.19 ± 0.30 | 1.17 ± 0.11              | 0.68 ± 0.09 <sup>a</sup> |
| T3           | 2.15 ± 0.25 | 1.08 ± 0.13 <sup>a</sup> | 0.46 ± 0.11              |
| Significance | NS          | *                        | *                        |

Statistical differences among samples were tested by the Kruskal-Wallis test at the 5% level of significance (NS: not significant. \*: significant). For the samples that showed statistical differences, a common letter indicates that samples are not significantly different based on the pair-wise Games-Howell *post hoc* test at the 5% level of significance.

**Table S2.** Morphological measurements of five almond cultivars submitted to *in vitro* digestion-fermentation.

| Cultivar     | Length (cm)               | Width (cm)                  | Thickness (cm)            |
|--------------|---------------------------|-----------------------------|---------------------------|
| Guara        | 2.46 ± 0.11               | 1.17 ± 0.13 <sup>abc</sup>  | 0.60 ± 0.16 <sup>ab</sup> |
| Vairo        | 2.23 ± 0.11 <sup>ab</sup> | 1.09 ± 0.10 <sup>adef</sup> | 0.49 ± 0.11               |
| Marta        | 2.29 ± 0.12 <sup>a</sup>  | 1.01 ± 0.12 <sup>d</sup>    | 0.62 ± 0.16 <sup>ac</sup> |
| Marinada     | 2.15 ± 0.17 <sup>b</sup>  | 1.11 ± 0.12 <sup>beg</sup>  | 0.63 ± 0.12 <sup>bc</sup> |
| Marcona      | 1.75 ± 0.09               | 1.17 ± 0.08 <sup>cfg</sup>  | 0.74 ± 0.11               |
| Significance | *                         | *                           | *                         |

Statistical differences among samples were tested by the Kruskal-Wallis test at the 5% level of significance (NS: not significant. \*: significant). For the samples that showed statistical differences, a common letter indicates that samples are not significantly different based on the pair-wise Games-Howell *post hoc* test at the 5% level of significance.

**Table S3.** Ash, moisture and protein content of five almond cultivars submitted to *in vitro* digestion-fermentation.

| Cultivar     | Moisture (%)  | Protein (%)  | Ash (%)     |
|--------------|---------------|--------------|-------------|
| Guara        | 40.01 ± 26.72 | 17.20 ± 7.33 | 2.78 ± 2.15 |
| Vairo        | 37.96 ± 26.06 | 17.99 ± 5.16 | 2.30 ± 1.04 |
| Marta        | 42.84 ± 28.69 | 15.71 ± 6.86 | 2.52 ± 1.61 |
| Marinada     | 44.37 ± 30.43 | 14.58 ± 6.98 | 1.98 ± 1.11 |
| Marcona      | 38.05 ± 22.40 | 15.27 ± 6.25 | 2.25 ± 1.14 |
| Significance | NS            | NS           | NS          |

Statistical differences among samples were tested by the Kruskal-Wallis test at the 5% level of significance (NS: not significant. \*: significant). For the samples that showed statistical differences, a common letter indicates that samples are not significantly different based on the pair-wise Games-Howell *post hoc* test at the 5% level of significance.

**Table S4.** Ash, moisture and protein content of almonds collected at three harvest times and submitted to *in vitro* digestion-fermentation.

| Harvest Time | Moisture (%) | Protein (%)               | Ash (%)     |
|--------------|--------------|---------------------------|-------------|
| T1           | 65.26 ± 7.55 | 11.81 ± 3.72 <sup>a</sup> | 1.38 ± 0.17 |
| T2           | 49.16 ± 3.74 | 12.86 ± 2.15 <sup>a</sup> | 1.57 ± 0.14 |
| T3           | 7.52 ± 1.43  | 23.78 ± 2.97              | 4.14 ± 0.98 |
| Significance | *            | *                         | *           |

Statistical differences among samples were tested by the Kruskal-Wallis test at the 5% level of significance (NS: not significant. \*: significant). For the samples that showed statistical differences, a common letter indicates that samples are not significantly different based on the pair-wise Games-Howell *post hoc* test at the 5% level of significance.

**Table S5.** Total antioxidant capacity of almonds collected at three harvest times and submitted to *in vitro* digestion-fermentation.

| Harvest Time | TEAC <sub>FRAP</sub><br>(mmol Trolox equivalents/kg) | TEAC <sub>DPPH</sub><br>(mmol Trolox equivalents/kg) | TEAC <sub>ABTS</sub><br>(mmol Trolox equivalents/kg) | Folin-Ciocalteu<br>(mg gallic acid equivalents/kg) |
|--------------|------------------------------------------------------|------------------------------------------------------|------------------------------------------------------|----------------------------------------------------|
| T1           | 248 ± 55.1                                           | 220 ± 14.97                                          | 1312 ± 116                                           | 44640 ± 3509                                       |
| T2           | 235 ± 17.08                                          | 217 ± 17.59                                          | 1270 ± 118                                           | 48693 ± 2630 <sup>a</sup>                          |
| T3           | 237 ± 28.16                                          | 215 ± 25.48                                          | 1283 ± 115                                           | 51060 ± 5531 <sup>a</sup>                          |
| Significance | NS                                                   | NS                                                   | NS                                                   | *                                                  |

Statistical differences among samples were tested by the Kruskal-Wallis test at the 5% level of significance (NS: not significant. \*: significant). For the samples that showed statistical differences, a common letter indicates that samples are not significantly different based on the pair-wise Games-Howell *post hoc* test at the 5% level of significance.

**Table S6.** Total antioxidant capacity of five almond cultivars submitted to *in vitro* digestion-fermentation.

| Cultivar     | TEAC <sub>FRAP</sub><br>(mmol Trolox equivalents/kg) | TEAC <sub>DPPH</sub><br>(mmol Trolox equivalents/kg) | TEAC <sub>ABTS</sub><br>(mmol Trolox equivalents/kg) | Folin-Ciocalteu<br>(mg gallic acid equivalents/kg) |
|--------------|------------------------------------------------------|------------------------------------------------------|------------------------------------------------------|----------------------------------------------------|
| Guara        | 266 ± 38.38 <sup>abc</sup>                           | 231 ± 12.17 <sup>abcd</sup>                          | 1280 ± 107                                           | 50683 ± 5585                                       |
| Vairo        | 200 ± 23.92 <sup>de</sup>                            | 20 ± 14.24 <sup>aefg</sup>                           | 1295 ± 177                                           | 45913 ± 3079                                       |
| Marta        | 241 ± 26.71 <sup>adfg</sup>                          | 217. ± 18.71 <sup>behi</sup>                         | 1306 ± 47                                            | 50986 ± 3883                                       |
| Marinada     | 264 ± 24.52 <sup>bfn</sup>                           | 200 ± 20.55 <sup>cfhj</sup>                          | 1311 ± 96                                            | 47672 ± 2171                                       |
| Marcona      | 230 ± 25.81 <sup>cegh</sup>                          | 230 ± 12.49 <sup>dgiij</sup>                         | 1250 ± 133                                           | 45403 ± 6220                                       |
| Significance | *                                                    | *                                                    | NS                                                   | NS                                                 |

Statistical differences among samples were tested by the Kruskal-Wallis test at the 5% level of significance (NS: not significant. \*: significant). For the samples that showed statistical differences, a common letter indicates that samples are not significantly different based on the pair-wise Games-Howell *post hoc* test at the 5% level of significance.
